# Supplementary material
Source: PubMed Central journal article supplement (PMC5410192)
Supplement: NIHMS857576-supplement.pdf [file NIHMS857576-supplement.pdf]

**Supplementary Table S1**

Associations between ABO blood type and ABO allele counts and Exam 1 ABI by race/ethnicity.<sup>a,b,c</sup>

| <i>ABO Blood Type</i>   | <b>Pooled Race/Ethnicity<sup>d</sup></b> |                |                            | <b>African American</b> |                | <b>Chinese American</b> |                | <b>Hispanic American</b> |                | <b>Non-Hispanic White American</b> |                |
|-------------------------|------------------------------------------|----------------|----------------------------|-------------------------|----------------|-------------------------|----------------|--------------------------|----------------|------------------------------------|----------------|
|                         | <b>Beta (SE)</b>                         | <b>p-value</b> | <b>Interaction p-value</b> | <b>Beta (SE)</b>        | <b>p-value</b> | <b>Beta (SE)</b>        | <b>p-value</b> | <b>Beta (SE)</b>         | <b>p-value</b> | <b>Beta (SE)</b>                   | <b>p-value</b> |
| O (Ref.)                | -                                        | -              | 0.48                       | -                       | -              | -                       | -              | -                        | -              | -                                  | -              |
| A                       | -0.003 (0.003)                           | 0.36           | -                          | -0.017 (0.007)          | 0.020          | -0.006 (0.008)          | 0.46           | 0.006 (0.006)            | 0.30           | 0.000 (0.005)                      | 0.95           |
| B                       | -0.004 (0.007)                           | 0.85           | -                          | -0.005 (0.009)          | 0.57           | 0.000 (0.008)           | 0.97           | 0.007 (0.009)            | 0.43           | -0.004 (0.001)                     | 0.58           |
| AB                      | 0.000 (0.004)                            | 0.52           | -                          | -0.005 (0.014)          | 0.75           | 0.008 (0.012)           | 0.48           | -0.010 (0.017)           | 0.57           | -0.009 (0.011)                     | 0.40           |
| <i>ABO Allele Count</i> | <b>Beta (SE)</b>                         | <b>p-value</b> | <b>Interaction p-value</b> | <b>Beta (SE)</b>        | <b>p-value</b> | <b>Beta (SE)</b>        | <b>p-value</b> | <b>Beta (SE)</b>         | <b>p-value</b> | <b>Beta (SE)</b>                   | <b>p-value</b> |
| O (Ref.)                | -                                        | -              | 0.20                       | -                       | -              | -                       | -              | -                        | -              | -                                  | -              |
| A                       | -0.003 (0.002)                           | 0.14           | -                          | -0.016 (0.006)          | 0.007          | -0.004 (0.006)          | 0.45           | 0.006 (0.005)            | 0.22           | -0.002 (0.003)                     | 0.59           |
| B                       | -0.001 (0.003)                           | 0.65           | -                          | -0.001 (0.007)          | 0.84           | 0.003 (0.006)           | 0.58           | 0.002 (0.007)            | 0.77           | 0.006 (0.006)                      | 0.27           |

ABI: ankle brachial index, SE: standard error.

<sup>a</sup> ABI at Exam 1 excluding ABI > 1.4.

<sup>b</sup> ABI = ankle brachial index; SE = standard error

<sup>c</sup> Adjusted for age, sex, BMI, smoking status, diabetes, hypertension, total cholesterol, HDL, SBP, and leading ancestry informative PCs.

<sup>d</sup> Pooled analyses adjusted for race/ethnicity using PCs; Interaction tests based on self-reported race/ethnicity.

**Supplementary Table S2**

Associations between ABO Blood Group and ABO allele counts and prevalent Peripheral Artery Disease by race/ethnicity.<sup>a,b,c</sup>

| <i>ABO Blood Type</i>   | <b>Pooled Race/Ethnicity<sup>d</sup></b> |                |                            | <b>African American</b> |                | <b>Chinese American</b> |                | <b>Hispanic American</b> |                | <b>Non-Hispanic White American</b> |                |
|-------------------------|------------------------------------------|----------------|----------------------------|-------------------------|----------------|-------------------------|----------------|--------------------------|----------------|------------------------------------|----------------|
|                         | <b>OR (95% CI)</b>                       | <b>p-value</b> | <b>Interaction P-value</b> | <b>OR (95% CI)</b>      | <b>p-value</b> | <b>OR (95% CI)</b>      | <b>p-value</b> | <b>OR (95% CI)</b>       | <b>p-value</b> | <b>OR (95% CI)</b>                 | <b>p-value</b> |
| O (Ref.)                | -                                        | -              | 0.15                       | -                       | -              | -                       | -              | -                        | -              | -                                  | -              |
| A                       | 1.14 (0.83,1.56)                         | 0.41           | -                          | 1.72 (1.06,2.78)        | 0.027          | 7.07 (1.15,70.1)        | 0.05           | 0.48 (0.17,1.21)         | 0.14           | 0.86 (0.51,1.44)                   | 0.57           |
| B                       | 0.67 (0.40,1.06)                         | 0.40           | -                          | 0.62 (0.28,1.23)        | 0.19           | 2.94 (0.38,31.8)        | 0.32           | 0.26 (0.14,1.33)         | 0.19           | 0.89 (0.35,1.96)                   | 0.78           |
| AB                      | 1.32 (0.66,2.45)                         | 0.10           | -                          | 1.72 (0.56,4.38)        | 0.30           | 3.72 (0.14,59.1)        | 0.35           | 0.46 (0.13,4.94)         | 0.60           | 1.19 (0.38,3.07)                   | 0.73           |
| <i>ABO Allele Count</i> | <b>OR (95% CI)</b>                       | <b>p-value</b> | <b>Interaction P-value</b> | <b>OR (95% CI)</b>      | <b>p-value</b> | <b>OR (95% CI)</b>      | <b>p-value</b> | <b>OR (95% CI)</b>       | <b>p-value</b> | <b>OR (95% CI)</b>                 | <b>p-value</b> |
| O (Ref.)                | -                                        | -              | 0.058                      | -                       | -              | -                       | -              | -                        | -              | -                                  | -              |
| A                       | 1.24 (0.97,1.56)                         | 0.076          | -                          | 1.70 (1.18,2.44)        | 0.0042         | 2.26 (0.84,6.33)        | 0.11           | 0.51 (0.19,1.17)         | 0.14           | 1.01 (0.69,1.47)                   | 0.94           |
| B                       | 0.81 (0.56,1.15)                         | 0.26           | -                          | 0.74 (0.42,1.23)        | 0.27           | 1.27 (0.29,4.78)        | 0.73           | 0.36 (0.05,1.28)         | 0.19           | 1.09 (0.57,1.91)                   | 0.78           |

CI: confidence interval, OR: odds ratio.

<sup>a</sup> Prevalent PAD defined as ABI  $\leq$  0.9, excluding ABI  $>$  1.4.

<sup>b</sup> CI = confidence interval; OR = odds ratio.

<sup>c</sup> Adjusted for age, sex, BMI, smoking status, diabetes, hypertension, total cholesterol, HDL, SBP, and leading ancestry informative PCs.

<sup>d</sup> Pooled analyses adjusted for race/ethnicity using PCs; Interaction tests based on self-reported race/ethnicity.

**Supplementary Table S3**

Associations between ABO Blood Group and ABO allele counts and incident peripheral artery disease by race/ethnicity.<sup>a,b,c</sup>

| <i>ABO Blood Type</i>   | <b>Pooled Race/Ethnicity<sup>d</sup></b> |                |                            | <b>African American</b> |                | <b>Chinese American</b> |                | <b>Hispanic American</b> |                | <b>Non-Hispanic White American</b> |                |
|-------------------------|------------------------------------------|----------------|----------------------------|-------------------------|----------------|-------------------------|----------------|--------------------------|----------------|------------------------------------|----------------|
|                         | <b>HR (95% CI)</b>                       | <b>p-value</b> | <b>Interaction p-value</b> | <b>HR (95% CI)</b>      | <b>p-value</b> | <b>HR (95% CI)</b>      | <b>p-value</b> | <b>HR (95% CI)</b>       | <b>p-value</b> | <b>HR (95% CI)</b>                 | <b>p-value</b> |
| O (Ref.)                | -                                        | -              | 0.41                       | -                       | -              | -                       | -              | -                        | -              | -                                  | -              |
| A                       | 1.04 (0.77,1.40)                         | 0.80           | -                          | 1.38 (0.84,2.25)        | 0.20           | 0.98 (0.24,4.03)        | 0.98           | 1.24 (0.62,2.46)         | 0.54           | 0.75 (0.47,1.20)                   | 0.23           |
| B                       | 1.17 (0.82,1.69)                         | 0.39           | -                          | 1.41 (0.48,3.12)        | 0.21           | 0.65 (0.16,2.66)        | 0.55           | 1.43 (0.60,3.41)         | 0.42           | 0.98 (0.47,2.02)                   | 0.95           |
| AB                      | 1.03 (0.54,1.98)                         | 0.92           | -                          | 1.22 (4.78,3.12)        | 0.68           | 0.85 (0.09,7.73)        | 0.89           | 3.65 (1.06,12.6)         | 0.041          | 0.23 (0.03,1.75)                   | 0.15           |
| <i>ABO Allele Count</i> | <b>HR (95% CI)</b>                       | <b>p-value</b> | <b>Interaction p-value</b> | <b>HR (95% CI)</b>      | <b>p-value</b> | <b>HR (95% CI)</b>      | <b>p-value</b> | <b>HR (95% CI)</b>       | <b>p-value</b> | <b>HR (95% CI)</b>                 | <b>p-value</b> |
| O (Ref.)                | -                                        | -              | 0.61                       | -                       | -              | -                       | -              | -                        | -              | -                                  | -              |
| A                       | 1.02 (0.81,1.28)                         | 0.88           | -                          | 1.17 (0.80,1.72)        | 0.41           | 1.30 (0.45,3.73)        | 0.63           | 1.22 (0.69,2.15)         | 0.49           | 0.82 (0.57,1.18)                   | 0.28           |
| B                       | 1.13 (0.86,1.50)                         | 0.38           | -                          | 1.22 (0.82,1.81)        | 0.33           | 0.68 (0.22,2.13)        | 0.51           | 1.61 (0.85,3.05)         | 0.14           | 0.87 (0.47,1.63)                   | 0.67           |

CI: confidence interval, HR: hazard ratio.

<sup>a</sup> Incident PAD is defined as ABI  $\leq$  0.9 at Exam 3 or Exam 5, excluding ABI  $>$  1.4 and prevalent PAD cases.

<sup>b</sup> CI = confidence interval; HR = hazard ratio.

<sup>c</sup> Adjusted for age, sex, BMI, smoking status, diabetes, hypertension, total cholesterol, HDL, SBP, and leading ancestry informative PCs.

<sup>d</sup> Pooled analyses adjusted for race/ethnicity using PCs; Interaction tests based on self-reported race/ethnicity.

### Supplementary Table S4

Characteristics of prevalent and incident peripheral arterial disease (PAD) for African Americans (standard deviation) or N (percentage).

| Characteristics                    | Prevalent PAD | Incident PAD | p-value  |
|------------------------------------|---------------|--------------|----------|
| n                                  | 101           | 95           |          |
| Age, years                         | 71 (8.2)      | 66 (8.9)     | < 0.0001 |
| Sex (Female)                       | 53 (52)       | 50 (53)      | 0.99     |
| Body mass index, kg/m <sup>2</sup> | 28 (5.7)      | 30 (5.5)     | 0.13     |
| Hypertension (Yes)                 | 80 (79)       | 62 (65)      | 0.02     |
| Systolic blood pressure, mmHg      | 143 (27)      | 134 (21)     | 0.01     |
| Diabetes mellitus (Yes)            | 24 (24)       | 22 (23)      | 0.98     |
| Total cholesterol, mg/dL           | 192 (38)      | 192 (37)     | 0.77     |
| HDL cholesterol, mg/dL             | 51 (15)       | 51 (15)      | 0.91     |
| Smoking status                     |               |              | 0.96     |
| Never                              | 41 (41)       | 37 (39)      |          |
| Former                             | 35 (35)       | 36 (38)      |          |
| Current                            | 25 (25)       | 22 (23)      |          |

HDL: high-density lipoprotein, PAD: peripheral arterial disease.
